# Supplementary material
Source: PubMed Central journal article supplement (PMC8599017)
Supplement: mmc1.pdf [file mmc1.pdf]

## 云南省中医医院/云南中医药大学第一附属医院伦理审查批件

批件号:科[2021]伦审字(015)-01 (NO.K[2021]015)

|                                    |                                                                                                                                       |       |                  |
|------------------------------------|---------------------------------------------------------------------------------------------------------------------------------------|-------|------------------|
| 研究方案名称                             | 特殊人群接种新冠疫苗不良反应观察及免疫反应监测研究                                                                                                             |       |                  |
| 项目类型                               | 研究者发起的临床研究                                                                                                                            |       |                  |
| 申办者                                | 云南省中医医院中心实验室、云南省传染病医院感染一科                                                                                                             |       |                  |
| 组长单位                               | 平行研究单位                                                                                                                                |       |                  |
| 研究科室/专业组                           | 云南省中医医院中心实验室、云南省传染病医院感染一科                                                                                                             | 主要研究者 | 万春平、吕正超          |
| 审查类别                               | 初始审查                                                                                                                                  | 审查方式  | 会议审查             |
| 审查日期                               | 2021年05月31日                                                                                                                           | 审查地点  | 云南省中医医院5号楼4楼大会议室 |
| 审查委员                               | 姜丽娟、肖泓、黄春江、何平、王华宁、贺建昌、纳玲、高晗、王家兰、李松梅、何敬、李桂琼（详见会议签到表）                                                                                   |       |                  |
| 伦理审查批准文件（含版本号）如下：                  |                                                                                                                                       |       |                  |
| 1. 初始审查申请                          |                                                                                                                                       |       |                  |
| 2. 临床研究方案（版本号：01/版本日期：2021年05月28日） |                                                                                                                                       |       |                  |
| 3. 知情同意书（（版本号：01/版本日期：2021年05月28日） |                                                                                                                                       |       |                  |
| 4. 研究病历                            |                                                                                                                                       |       |                  |
| 5. 主要研究专业履历表                       |                                                                                                                                       |       |                  |
| 6. 主要研究者及研究团队人员利益冲突声明              |                                                                                                                                       |       |                  |
| 7. 临床研究保密承诺                        |                                                                                                                                       |       |                  |
| 投票结果                               | 应到： <u>13</u> 人，实到： <u>13</u> 人，回避： <u>1</u> 人。<br>同意： <u>12</u> 票，必要的修改后同意： <u>0</u> 票，不同意： <u>0</u> 票，<br>终止或者暂停已同意的研究： <u>0</u> 票。 |       |                  |
| 审查决定                               | 同意                                                                                                                                    |       |                  |
| 意见建议                               | 1. 充分考虑免疫相关混杂因素的控制。<br>2. 建议方案设计中对照组设计的考虑。                                                                                            |       |                  |
| 年度/定期跟踪审查频率                        | 12个月                                                                                                                                  |       |                  |

|                |                                                                                                                                                                                                                                                                                                                                                                                                                                                                                                                                                                                                                                                                                                              |
|----------------|--------------------------------------------------------------------------------------------------------------------------------------------------------------------------------------------------------------------------------------------------------------------------------------------------------------------------------------------------------------------------------------------------------------------------------------------------------------------------------------------------------------------------------------------------------------------------------------------------------------------------------------------------------------------------------------------------------------|
| 批件有效期          | 2021年05月31日至2022年05月31日                                                                                                                                                                                                                                                                                                                                                                                                                                                                                                                                                                                                                                                                                      |
| 申明             | 本伦理委员会的组成和工作程序符合GCP原则及国家相关法规的要求。                                                                                                                                                                                                                                                                                                                                                                                                                                                                                                                                                                                                                                                                             |
| 注意事项           | <p><b>注意事项（请仔细阅读）：</b></p> <ol style="list-style-type: none"> <li>1. 请遵循GCP原则和伦理委员会批准的方案开展临床研究，保护受试者的安全与权益。</li> <li>2. 研究过程中若变更主要研究者，对临床研究方案、知情同意书及招募材料等的修改，请申请人向伦理委员会提交“修正案审查申请”，经伦理委员会审查批准后执行。</li> <li>3. 研究过程中如有安全性信息更新等，请申请人及时提交“安全性信息报告”。</li> <li>4. 请按照伦理委员会规定的年度/定期跟踪审查频率，在截止日期前10-20个工作日提交“研究进展报告”。</li> <li>5. 研究纳入了不符合纳入标准或符合排除标准的受试者，符合中止试验规定而未让受试者退出研究，给予错误治疗或剂量，给予方案禁止的合并用药等没有遵从方案开展研究的情况；或可能对受试者的安全/权益、以及研究的科学性造成不良影响等违背GCP原则等的严重方案违背、持续方案违背，请申办者/监查员/研究者提交“违背方案报告”。</li> <li>6. 终止或者暂停临床研究，请及时提交“终止/暂停研究报告”。</li> <li>7. 研究过程中如出现可能显著影响临床试验的实施或者增加受试者风险的情况，申请人应当尽快向伦理委员会书面报告。</li> <li>8. 完成临床研究，请申请人提交“结题报告”及临床试验结果的摘要。</li> <li>9. 凡涉及中国人类遗传资源管理办公室批准的研究项目，需获得遗传办公室批准后才能开始研究。</li> </ol> |
| 主任委员（或被授权者）签名： |                                                                                                                                                                                                                                                                                                                                                                                                                                                    |
| 联系方式           | <p>云南省中医医院医学伦理委员会（盖章）</p> <p>日期：2021年5月31日</p> <p>地址：云南省昆明市五华区光华街120号 邮编：650021</p> <p>联系人：马军 联系电话：0871-63625561</p> <p>邮箱：ynszyylunli@126.com</p>                                                                                                                                                                                                                                                                                                                                                                                                                                                                                                                                                           |
